# Supplementary material
Source: MDPI journal article supplement (https://www.mdpi.com/2072-4292/15/10/2667)
Supplement: s1 [file s1]

## Appendices

**Table S1.** Table of key information about the plots

| Plots | Area              | Latitude   | Longitude   | Main dominant tree species | Diameter at breast height | Tree height | Restoring history | Canopy closure |
|-------|-------------------|------------|-------------|----------------------------|---------------------------|-------------|-------------------|----------------|
| 1     | 400m <sup>2</sup> | 26.41.4484 | 117.47.3298 | Alniphyllum fortunei       | 14.7                      | 9.4         | Natural recovery  | 0.80           |
| 2     | 400m <sup>2</sup> | 26.41.4434 | 117.47.3329 | Castanopsis tibetana       | 13.1                      | 10.8        | Natural recovery  | 0.70           |
| 3     | 400m <sup>2</sup> | 26.41.4689 | 117.47.3136 | Choerospondias axillaris   | 14.2                      | 7.4         | Natural recovery  | 0.65           |
| 4     | 400m <sup>2</sup> | 26.41.4822 | 117.47.3323 | Castanopsis tibetana       | 14.7                      | 12.3        | Natural recovery  | 0.70           |
| 5     | 400m <sup>2</sup> | 26.41.4805 | 117.47.3452 | Alniphyllum fortunei       | 15.0                      | 12.0        | Natural recovery  | 0.90           |
| 6     | 400m <sup>2</sup> | 26.41.0460 | 117.48.2448 | Castanopsis tibetana       | 16.7                      | 12.5        | Natural recovery  | 0.95           |
| 7     | 400m <sup>2</sup> | 26.41.4992 | 117.47.3444 | Castanopsis tibetana       | 12.8                      | 10.7        | Natural recovery  | 0.75           |
| 8     | 400m <sup>2</sup> | 26.41.4801 | 117.47.3639 | Rhododendron championae    | 14.4                      | 10.4        | Natural recovery  | 0.60           |
| 9     | 400m <sup>2</sup> | 26.41.5085 | 117.47.0347 | Alniphyllum fortunei       | 14.5                      | 12.5        | Natural recovery  | 0.80           |
| 10    | 400m <sup>2</sup> | 26.41.5048 | 117.47.3634 | Daphniphyllum oldhamii     | 14.5                      | 11.9        | Natural recovery  | 0.80           |
| 11    | 400m <sup>2</sup> | 26.41.4999 | 117.47.3450 | Castanopsis fargesii       | 17.2                      | 12.2        | Natural recovery  | 0.70           |
| 12    | 400m <sup>2</sup> | 26.41.4825 | 117.47.3318 | Castanopsis lamontii       | 16.8                      | 11.3        | Natural recovery  | 0.60           |
| 13    | 400m <sup>2</sup> | 26.42.1415 | 117.48.1237 | Castanopsis fargesii       | 12.7                      | 9.5         | Natural recovery  | 0.70           |

|    |                   |                |                 |                                              |      |      |                     |      |
|----|-------------------|----------------|-----------------|----------------------------------------------|------|------|---------------------|------|
| 14 | 400m <sup>2</sup> | 26.41.<br>4434 | 117.47.<br>3229 | Engelhar<br>dtia<br>fenzlii                  | 10.7 | 9.6  | Natural<br>recovery | 0.70 |
| 15 | 400m <sup>2</sup> | 26.42.<br>1442 | 117.48.<br>0149 | Castanop<br>sis<br>lamontii                  | 10.0 | 9.6  | Natural<br>recovery | 0.95 |
| 16 | 400m <sup>2</sup> | 26.42.<br>1499 | 117.48.<br>1487 | Engelhar<br>dtia<br>fenzlii                  | 13.4 | 11.3 | Natural<br>recovery | 0.65 |
| 17 | 400m <sup>2</sup> | 26.42.<br>1446 | 117.48.<br>1668 | Engelhar<br>dtia<br>fenzlii                  | 10.4 | 8.2  | Natural<br>recovery | 0.98 |
| 18 | 400m <sup>2</sup> | 26.42.<br>1389 | 117.48.<br>1644 | Castanop<br>sis<br>fargesii                  | 10.2 | 8.4  | Natural<br>recovery | 0.85 |
| 19 | 400m <sup>2</sup> | 26.42.<br>1217 | 117.48.<br>1424 | Castanop<br>sis<br>tibetana                  | 11.9 | 8.9  | Natural<br>recovery | 0.80 |
| 20 | 400m <sup>2</sup> | 26.42.<br>1247 | 117.48.<br>1586 | Castanop<br>sis<br>lamontii                  | 10.6 | 8.6  | Natural<br>recovery | 0.90 |
| 21 | 400m <sup>2</sup> | 26.42.<br>1163 | 117.48.<br>1578 | Nyssa<br>sinensis                            | 10.8 | 8.6  | Natural<br>recovery | 0.85 |
| 22 | 400m <sup>2</sup> | 26.42.<br>1263 | 117.48.<br>0531 | Neolitsea<br>aurata<br>var.<br>chekiangensis | 17.1 | 12.6 | Natural<br>recovery | 0.65 |
| 23 | 400m <sup>2</sup> | 26.42.<br>1174 | 117.48.<br>0081 | Sloanea<br>sinensis                          | 17.1 | 10.4 | Natural<br>recovery | 0.65 |
| 24 | 400m <sup>2</sup> | 26.42.<br>1176 | 117.47.<br>5924 | Ilex limii                                   | 14.9 | 9.6  | Natural<br>recovery | 0.70 |
| 25 | 400m <sup>2</sup> | 26.42.<br>1147 | 117.47.<br>5834 | Castanop<br>sis<br>fargesii                  | 14.6 | 10.0 | Natural<br>recovery | 0.70 |
| 26 | 400m <sup>2</sup> | 26.42.<br>1161 | 117.47.<br>5685 | Castanop<br>sis carlesii                     | 12.1 | 9.2  | Natural<br>recovery | 0.65 |
| 27 | 400m <sup>2</sup> | 26.42.<br>1124 | 117.47.<br>5342 | Cunningh<br>amia<br>lanceolata               | 18.4 | 10.0 | Natural<br>recovery | 0.70 |
| 28 | 400m <sup>2</sup> | 26.42.<br>0105 | 117.47.<br>5353 | Castanop<br>sis<br>fargesii                  | 15.7 | 9.7  | Natural<br>recovery | 0.70 |
| 29 | 400m <sup>2</sup> | 26.42.<br>1146 | 117.48.<br>0136 | Schima<br>superba                            | 15.0 | 10.2 | Natural<br>recovery | 0.70 |
| 30 | 400m <sup>2</sup> | 26.42.<br>1010 | 117.48.<br>0160 | Castanop<br>sis eyrei                        | 14.4 | 11.3 | Natural<br>recovery | 0.75 |
| 31 | 400m <sup>2</sup> | 26.42.<br>0978 | 117.48.<br>0380 | Manglietia<br>yuyuanensis                    | 16.2 | 10.7 | Natural<br>recovery | 0.65 |

|    |       |                |                 |                             |      |     |                     |      |
|----|-------|----------------|-----------------|-----------------------------|------|-----|---------------------|------|
|    |       |                |                 | sis                         |      |     |                     |      |
| 32 | 400m2 | 26.42.<br>1115 | 117.48.<br>0424 | Lithocarp<br>us glaber      | 15.4 | 9.4 | Natural<br>recovery | 0.60 |
| 33 | 400m2 | 26.42.<br>0108 | 117.48.<br>0641 | Engelhar<br>dtia<br>fenzlii | 14.9 | 8.6 | Natural<br>recovery | 0.80 |

---

**Table S2.** Alternative parameters and information entropy

| <b>Indicator</b>            | <b>Data source</b> | <b>Unit</b> | <b>Information entropy</b> |
|-----------------------------|--------------------|-------------|----------------------------|
| Normalized Burn Ratio       | Landsat            | /           | 0.99                       |
| Disturbance Index           | Landsat            | /           | 0.99                       |
| Height of tree              | Airborne LIDAR     | m           | 0.93                       |
| Canopy closure              | Airborne LIDAR     | /           | 0.92                       |
| Leaf Area Index             | Airborne LIDAR     | /           | 0.95                       |
| Naturalness                 | FMPI               | /           | 0.95                       |
| Type of community structure | FMPI               | /           | 0.95                       |
| Above-ground biomass        | FMPI               | t/ha        | 0.81                       |
| eluvial horizon thickness   | FMPI               | cm          | 0.97                       |

**Table S3.** Table of definitions of naturalness and community structure type values

| Indicators                  | Type               | Value range | Notes                                                                                             |
|-----------------------------|--------------------|-------------|---------------------------------------------------------------------------------------------------|
| Naturalness                 | III                | (0-0.33]    | Secondary or natural forest that has been almost destroyed after considerable human disturbances. |
|                             | II                 | (0.33-0.66] | Natural vegetation with significant human disturbance or communities in secondary succession.     |
|                             | I                  | (0.66-1]    | Communities with little or a little human disturbance.                                            |
| Type of community structure | Simple structure   | (0-0.33]    | Communities with only herbaceous layer or bare soil.                                              |
|                             | Complex structures | (0.33-0.66] | Communities with shrub and herb layers.                                                           |
|                             | Complete structure | (0.66-1]    | Forest communities with 3 vegetation layers: tree layer, shrub layer and herb layer               |

**Table S4.** Airborne LIDAR and FMPI recorded data on regions A to R

| Land cover type |   | Mean height | Canopy closure | Naturalness | Type of community structure | Above ground biomass(t/ha) | Age of tree | RI   | RV   |
|-----------------|---|-------------|----------------|-------------|-----------------------------|----------------------------|-------------|------|------|
| Bare land       | A | 0           | 0.04           | 0.17        | 0.17                        | 0                          | 0           | 1.04 | 0    |
|                 | B | 0.11        | 0.12           | 0.17        | 0.17                        | 0                          | 0           | 0.92 | 0.02 |
|                 | C | 0.07        | 0.06           | 0.17        | 0.17                        | 0                          | 0           | 0.94 | 0    |
|                 | D | 0           | 0              | 0.28        | 0.25                        | 0                          | 0           | 0.98 | 0.05 |
|                 | E | 0.72        | 0.16           | 0.19        | 0.2                         | 1.47                       | 2           | 1.12 | 0.03 |
| Shrubs and herb | F | 2.42        | 0.16           | 0.49        | 0.53                        | 20.25                      | 4.3         | 1.1  | 0.4  |
|                 | G | 2.48        | 0.16           | 0.48        | 0.73                        | 13.4                       | 7.45        | 1.22 | 0.49 |
|                 | H | 1.65        | 0.41           | 0.5         | 0.83                        | 9.03                       | 9.65        | 0.98 | 0.52 |
|                 | I | 2.42        | 0.19           | 0.5         | 0.83                        | 10.8                       | 13.94       | 0.97 | 0.52 |
|                 | J | 3.11        | 0.22           | 0.5         | 0.83                        | 12.32                      | 11.98       | 1.17 | 0.57 |
| Forest          | K | 3.515       | 0.46           | 0.75        | 0.83                        | 45.3                       | 27          | 0.98 | 0.83 |
|                 | L | 4.875       | 0.45           | 0.75        | 0.83                        | 33.41                      | 21.25       | 1.2  | 0.73 |
|                 | M | 2.92        | 0.32           | 0.80        | 0.80                        | 17.47                      | 12.69       | 1.11 | 0.70 |
|                 | N | 4.5         | 0.32           | 0.83        | 0.83                        | 9.27                       | 12.35       | 1.07 | 0.74 |
|                 | O | 2.6         | 0.65           | 0.78        | 0.83                        | 58.11                      | 7.79        | 1.02 | 0.85 |

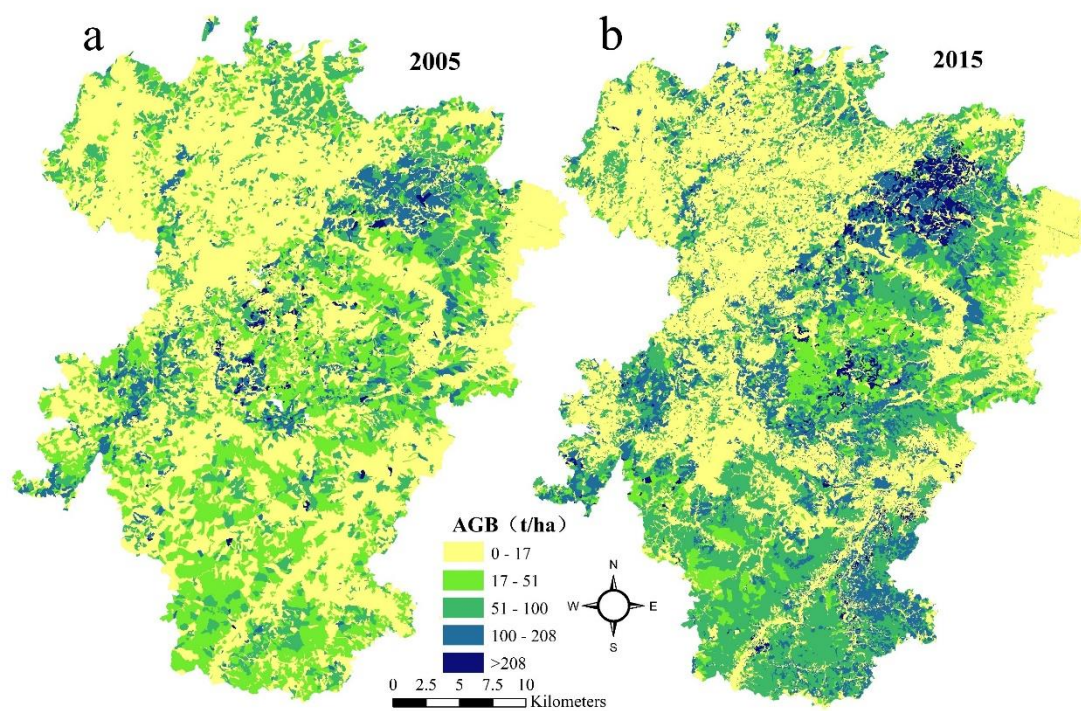

**Figure S1** Aboveground biomass distribution of the study area in 2005 and 2015

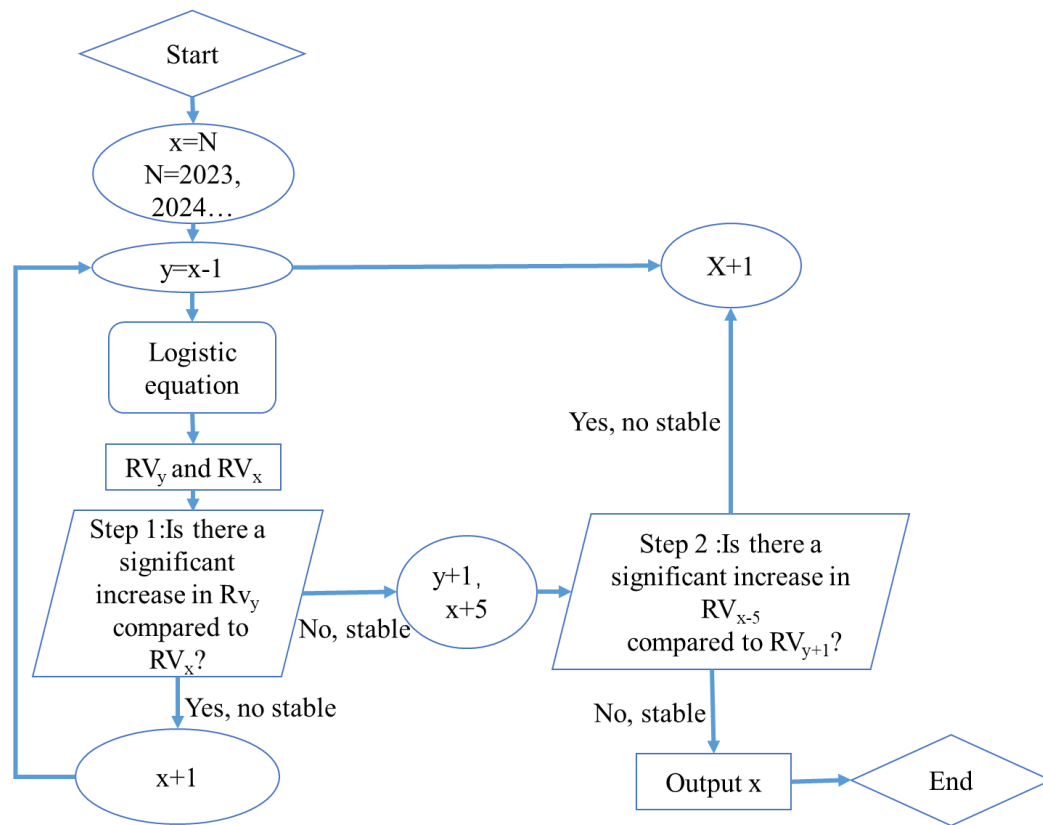

**Figure S2.** A flowchart of how to find the key year  $x$ . We define that the recovery of the study area will reach a stable state after  $x$ .  $RV_x$  is a cluster of raster values for the entire region. In terms of the reference [1] and the data of our study area, the after-five-years is chosen to test the stable state.1. Pickell, P.D.; Hermosilla, T.; Frazier, R.J.; Coops, N.C.; Wulder, M.A. Forest recovery trends derived from Landsat time series for North American boreal forests. *Int. J. Remote Sens.* **2016**, *37*, 138-149, doi:10.1080/2150704x.2015.1126375.
